# Supplementary material for: Response surface methodology and optimized synthesis of guar gum-based hydrogels with enhanced swelling capacity
Source: Royal Society of Chemistry journal article supplement (doi:10.1039/c4ra05300a), 2014-08-18
Supplement: c4ra05300a1.pdf [file c4ra05300a1.pdf]

## **Supplementary Information**

for

### **Response surface methodology and optimized synthesis of guar gum-based hydrogels with enhanced swelling capacity**

Balbir S. Kaith<sup>1</sup>, Reena Sharma<sup>2</sup>, Susheel Kalia<sup>3\*</sup>, and Manpreet S. Bhatti<sup>4</sup>

<sup>1</sup>Department of Chemistry, Dr. B.R. Ambedkar National Institute of Technology, Jalandhar, Punjab, India

<sup>2</sup>School of Chemistry, Shoolini University, Bajhol, Solan, Himachal Pradesh, India

<sup>3</sup>Department of Chemistry, Bahra University, Shimla Hills, Wagnaghat, Himachal Pradesh, India

<sup>4</sup>Department of Botanical and Environmental Sciences, Guru Nanak Dev University, Amritsar, Punjab, India.

### **Table of contents**

| <b>content</b>                                                                                | <b>Page no.</b> |
|-----------------------------------------------------------------------------------------------|-----------------|
| <b>Table S1:</b> Resolution-IV design for screening of important process variables in Phase-1 | 2               |
| <b>Table S2:</b> Factorial design with fitted ANOVA statistics in Phase-2                     | 3               |
| <b>Table S3:</b> Center composite design with fitted ANOVA statistics in Phase-3              | 4               |
| <b>Fig. S1.</b> Normal plot of residuals of Resolution-IV design as per Phase-1               | 5               |
| <b>Fig. S2.</b> Pareto chart showing significant process variables as per Phase-2             | 5               |
| <b>Fig. S3.</b> Center composite design showing design points as per Phase-3                  | 6               |
| <b>Statistical Modelling details:</b> Experimental design and model development               | 7-9             |

**Table S1:** Resolution-IV design for screening of important process variables in Phase-1

| S. no. | Point type | A                                  | B             | C    | D                                | E             | F                                    | G            | Response           |           |
|--------|------------|------------------------------------|---------------|------|----------------------------------|---------------|--------------------------------------|--------------|--------------------|-----------|
|        |            | Initiator conc. x 10 <sup>-3</sup> | Reaction time | pH   | Monomer conc. x 10 <sup>-6</sup> | Reaction temp | Crosslinker conc. x 10 <sup>-3</sup> | Vacuum level | Swelling rate (Ps) |           |
|        |            | Units → mol / L                    | min           | -    | mol / L                          | °C            | mol / L                              | mm of Hg     | Actual             | Predicted |
| 1      | Factorial  | 35.0                               | 60            | 6.50 | 145.0                            | 40            | 64.1                                 | 800          | 3939               | 4088      |
| 2      | Center     | 26.3                               | 75            | 7.00 | 217.5                            | 60            | 53.4                                 | 600          | 4613               | 4623      |
| 3      | Factorial  | 17.5                               | 90            | 7.50 | 145.0                            | 40            | 64.1                                 | 800          | 4399               | 4414      |
| 4      | Factorial  | 35.0                               | 60            | 7.50 | 145.0                            | 80            | 64.1                                 | 400          | 2874               | 2818      |
| 5      | Factorial  | 35.0                               | 90            | 7.50 | 290.0                            | 80            | 64.1                                 | 800          | 2721               | 2780      |
| 6      | Factorial  | 35.0                               | 90            | 6.50 | 145.0                            | 80            | 42.7                                 | 800          | 4193               | 4088      |
| 7      | Factorial  | 17.5                               | 60            | 6.50 | 145.0                            | 40            | 42.7                                 | 400          | 4388               | 4420      |
| 8      | Factorial  | 17.5                               | 90            | 6.50 | 290.0                            | 40            | 42.7                                 | 800          | 3279               | 3169      |
| 9      | Factorial  | 17.5                               | 60            | 7.50 | 145.0                            | 80            | 42.7                                 | 800          | 4469               | 4414      |
| 10     | Factorial  | 17.5                               | 60            | 6.50 | 290.0                            | 80            | 64.1                                 | 800          | 3098               | 3169      |
| 11     | Factorial  | 17.5                               | 90            | 7.50 | 290.0                            | 80            | 42.7                                 | 400          | 3131               | 3163      |
| 12     | Center     | 26.3                               | 75            | 7.00 | 217.5                            | 60            | 53.4                                 | 600          | 4724               | 4623      |
| 13     | Factorial  | 17.5                               | 60            | 7.50 | 290.0                            | 40            | 64.1                                 | 400          | 3156               | 3163      |
| 14     | Factorial  | 35.0                               | 90            | 6.50 | 290.0                            | 40            | 64.1                                 | 400          | 4024               | 4050      |
| 15     | Factorial  | 17.5                               | 90            | 6.50 | 145.0                            | 80            | 64.1                                 | 400          | 4413               | 4420      |
| 16     | Factorial  | 35.0                               | 90            | 7.50 | 145.0                            | 40            | 42.7                                 | 400          | 2806               | 2818      |
| 17     | Center     | 26.3                               | 75            | 7.00 | 217.5                            | 60            | 53.4                                 | 600          | 4531               | 4623      |
| 18     | Factorial  | 35.0                               | 60            | 7.50 | 290.0                            | 40            | 42.7                                 | 800          | 2794               | 2780      |
| 19     | Factorial  | 35.0                               | 60            | 6.50 | 290.0                            | 80            | 42.7                                 | 400          | 4120               | 4050      |

**Table S2:** Factorial design with fitted ANOVA statistics in Phase-2

| S. no.         | Point type<br>Units → | <b>A</b>                              | <b>C</b>  | <b>D</b>                            | <b>Response</b>    |           |
|----------------|-----------------------|---------------------------------------|-----------|-------------------------------------|--------------------|-----------|
|                |                       | Initiator conc.<br>x 10 <sup>-3</sup> | pH        | Monomer conc.<br>x 10 <sup>-6</sup> | Swelling rate (Ps) |           |
|                |                       | mol/L                                 | -         | mol/L                               | %                  |           |
| Coded (Actual) |                       |                                       |           |                                     | Actual             | Predicted |
| 1              | Factorial             | -1 (17.5)                             | -1 (6.25) | -1 (116.0)                          | 3353               | 3482      |
| 2              | Factorial             | -1 (17.5)                             | -1 (6.25) | +1 (217.5)                          | 3516               | 3482      |
| 3              | Factorial             | -1 (17.5)                             | +1 (7.00) | -1 (116.0)                          | 5569               | 5593      |
| 4              | Factorial             | -1 (17.5)                             | +1 (7.00) | +1 (217.5)                          | 5712               | 5593      |
| 5              | Factorial             | +1 (35.0)                             | -1 (6.25) | -1 (116.0)                          | 3072               | 3093      |
| 6              | Factorial             | +1 (35.0)                             | -1 (6.25) | +1 (217.5)                          | 3208               | 3093      |
| 7              | Factorial             | +1 (35.0)                             | +1 (7.00) | -1 (116.0)                          | 5032               | 5205      |
| 8              | Factorial             | +1 (35.0)                             | +1 (7.00) | +1 (217.5)                          | 5283               | 5205      |
| 9              | Center                | 0 (26.3)                              | 0 (6.63)  | 0 (166.8)                           | 4628               | 4472      |
| 10             | Center                | 0 (26.3)                              | 0 (6.63)  | 0 (166.8)                           | 4464               | 4472      |
| 11             | Center                | 0 (26.3)                              | 0 (6.63)  | 0 (166.8)                           | 4324               | 4472      |

**ANOVA statistics of reduced linear model**

| Source             | F-value | p-value<br>Prob > F |
|--------------------|---------|---------------------|
| Model              | 224.050 | < 0.0001 *          |
| A: Initiator conc. | 14.691  | 0.0050 *            |
| C: pH              | 433.409 | < 0.0001 *          |
| Lack of Fit        | 0.852   | 0.628 #             |

**Model statistics:**  $R^2 = 0.982$      $Adj R^2 = 0.978$      $Pred R^2 = 0.968$

\* significant at  $p < 0.05$

# not-significant at  $p < 0.05$

**Table S3:** Center composite design with fitted ANOVA statistics in Phase-3

| S. no. | Point type | <b>A</b>                              | <b>C</b>       | <b>Response</b>    |           |
|--------|------------|---------------------------------------|----------------|--------------------|-----------|
|        |            | Initiator conc.<br>x 10 <sup>-3</sup> | pH             | Swelling rate (Ps) |           |
|        |            | Units →<br>mol/L                      | -              | %                  |           |
|        |            | Coded (Actual)                        | Coded (Actual) | Actual             | Predicted |
| 1      | Factorial  | -1 (19.4)                             | -1 (6.75)      | 4770               | 4675      |
| 2      | Factorial  | -1 (19.4)                             | +1 (7.25)      | 4345               | 4116      |
| 3      | Factorial  | +1 (28.7)                             | -1 (6.75)      | 4219               | 4085      |
| 4      | Factorial  | +1 (28.7)                             | +1 (7.25)      | 3559               | 3526      |
| 5      | Axial      | 0 (24.1)                              | -1.41 (6.65)   | 4029               | 4140      |
| 6      | Axial      | 0 (24.1)                              | +1.41 (7.35)   | 3216               | 3350      |
| 7      | Axial      | -1.41 (17.5)                          | 0 (7.00)       | 4695               | 4873      |
| 8      | Axial      | +1.41 (30.6)                          | 0 (7.00)       | 3971               | 4038      |
| 9      | Center     | 0 (24.1)                              | 0 (7.00)       | 5170               | 5223      |
| 10     | Center     | 0 (24.1)                              | 0 (7.00)       | 5325               | 5223      |
| 11     | Center     | 0 (24.1)                              | 0 (7.00)       | 5031               | 5223      |
| 12     | Center     | 0 (24.1)                              | 0 (7.00)       | 5390               | 5223      |
| 13     | Center     | 0 (24.1)                              | 0 (7.00)       | 5202               | 5223      |

**ANOVA statistics of reduced quadratic model**

| Source             | F-value | p-value<br>Prob > F |
|--------------------|---------|---------------------|
| Model              | 50.55   | < 0.0001*           |
| A: Initiator conc. | 24.70   | 0.0011*             |
| C: pH              | 22.12   | 0.0015*             |
| A <sup>2</sup>     | 36.31   | 0.0003*             |
| C <sup>2</sup>     | 134.69  | < 0.0001*           |
| Lack of Fit        | 1.88    | 0.2781#             |

**Model statistics:** R<sup>2</sup> = 0.961    Adj R<sup>2</sup> = 0.942    Pred R<sup>2</sup> = 0.864

\* significant at p<0.05

# not-significant at p<0.05

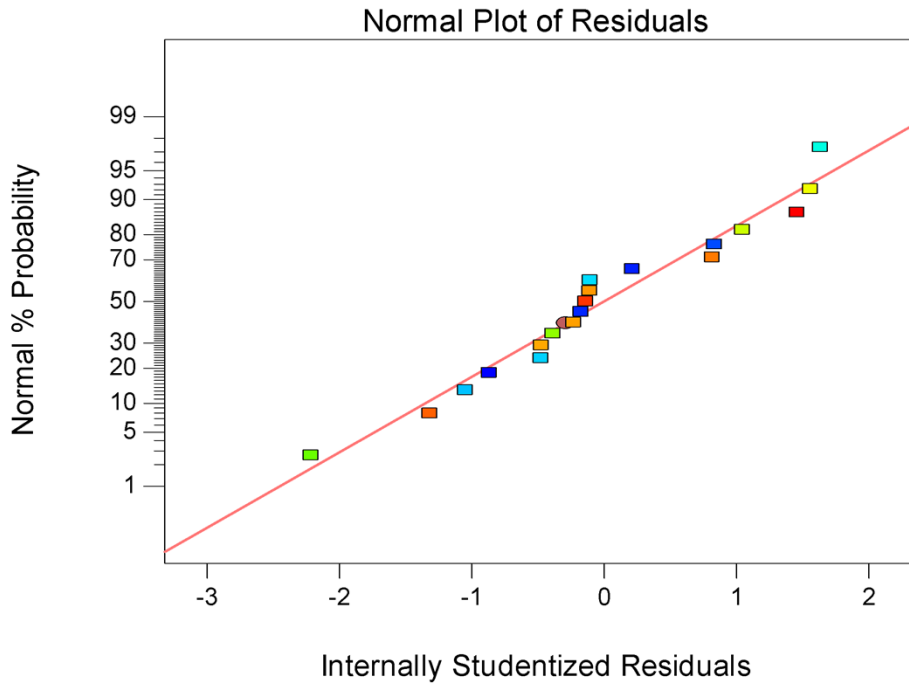

Fig. S1. Normal plot of residuals of Resolution-IV design as per Phase-1

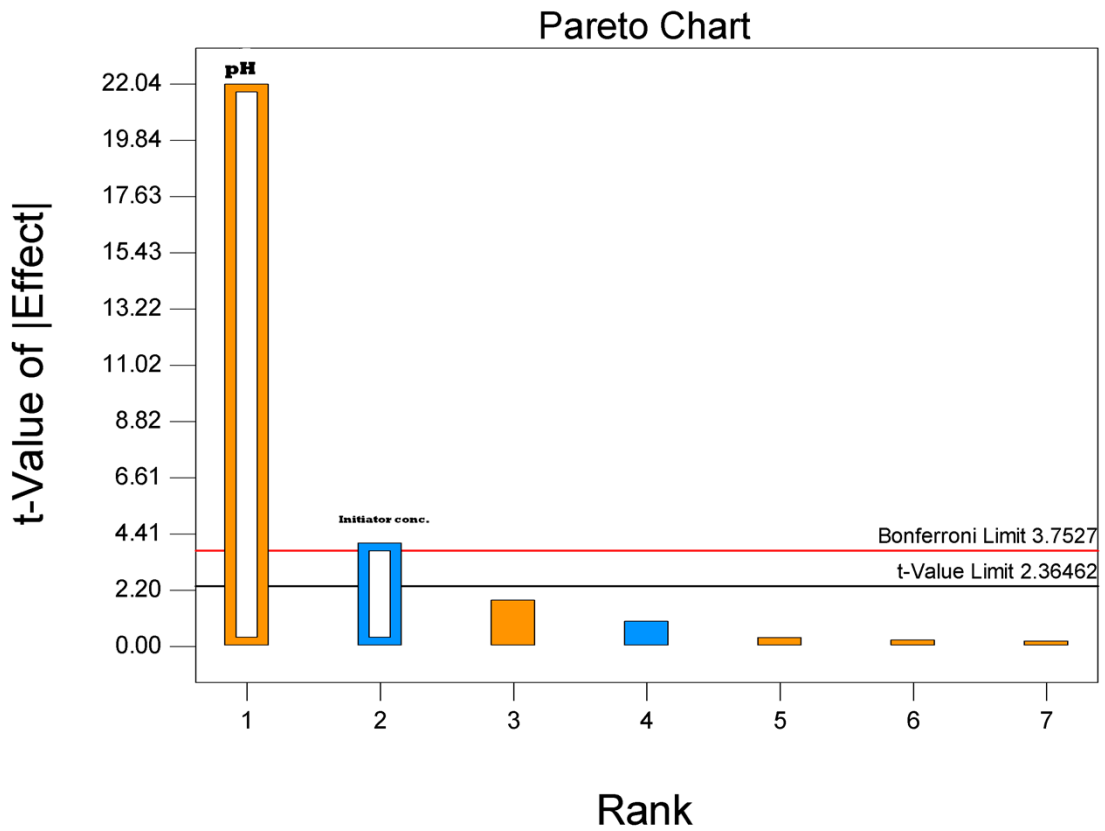

Fig. S2. Pareto chart showing significant process variables as per Phase-2

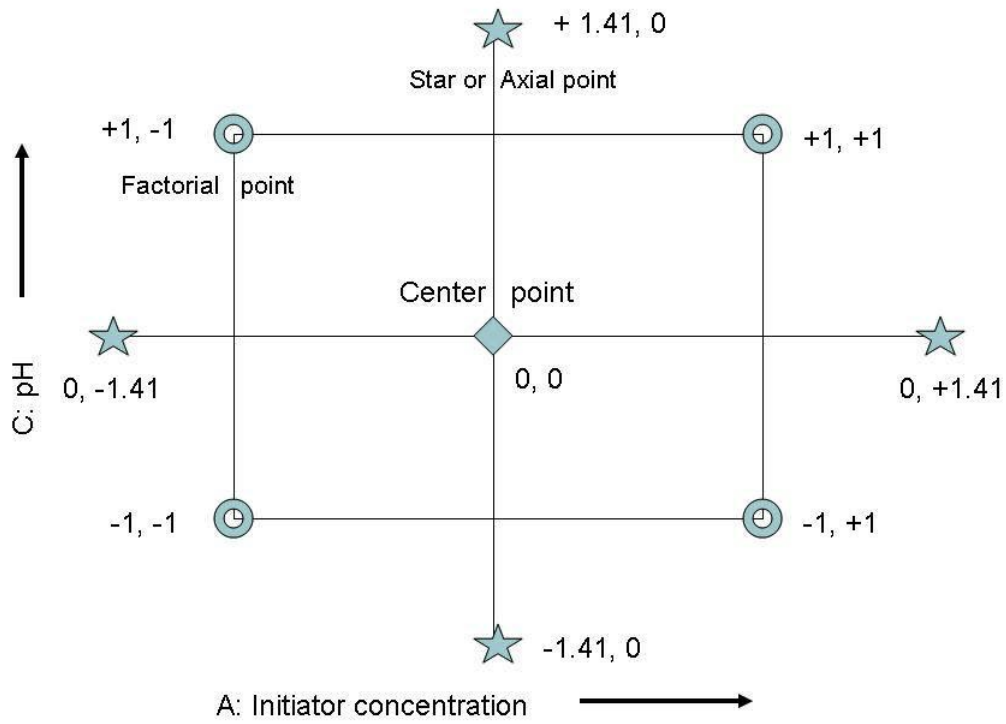

**Fig. S3.** Center composite design showing design points as per Phase-3

## Statistical modelling details:

### Experimental design and model development for Ggum-cl-poly(AA)

Process optimization using design of experiments (DOE) yield good results when significant process variables were selected in model building. Addition of non-significant or redundant variables added model noise and thus model generated has poor prediction capabilities. Robust experimental design strategy suggests that first applying either OFAT or fractional factorial design (Resolution-IV) to screen important variables using t-test or stringent significance testing through Boneferroi limits. Resolution-IV is slightly cautious design but at the same time, it saves the experimental runs ( $2^{7-3}$ ) from 128 runs ( $2^7$ ) and is the choice for screening variables. This design allows all main effects to be estimated and along with few two factor interactions (2FI). Although, 2FI is aliased with each other, but this will be taken care using subject matter knowledge. Response Surface Optimization using central composite design (CCD) is the best choice for fine tuning of the process conditions. The methodology of sequential experimentation explained above will result in sound and robust DOE, wherein, experimentation will be carried with significant variables only, eliminating all noise variables at preliminary stage and the analysis will yield a model with good predictability and explained excellent variance of the response data. Model fitting and graphical analyses were carried out using the Design-Expert software v9.0 (Stat-Ease Inc., Minneapolis, USA).

### *Phase-1: Screening of significant variables*

Experimental data (Table S1) was modeled to screen the important process variables (Table S1). ANOVA model was highly significant at 99.99% ( $F=189.4$ , degree of freedom ( $df$ )=5) with not-significant *lack of fit* ( $p=0.7029$ ) (table not shown). The fitted model explained 72% variance ( $R^2=0.720$ ) with coefficient of variation (CV) of 12% and signal to noise (S/N) ratio of 6.45 ( $> 4$  is recommended). The selected models were generated both in terms of coded factors (standardized equations) and actual factors (unstandardized equations) as given in Eq.(1) and Eq.(2) respectively. The regression constants in the coded equation are unitless coefficients and are used for process understanding.

$$P_s = + 3772.19 - 178.79 A - 319.10 C - 322.34 D - 316.18 A \times C + 303.16 A \times D \quad (1)$$

$P_s$ = Percentage Swelling (%) and A= initiator, C=pH and D=monomer are in coded units.

$$P_s = - 808.244 + 381.516 A + 1258.892 C - 16.990 D - 72.270 A \times C + 0.477 A \times D \quad (2)$$

$P_s$ = Percentage Swelling (%) and  $A$ = initiator conc. ( $\text{mol L}^{-1}$ ),  $C$ =pH and  $D$ =monomer concentration ( $\text{mole L}^{-1}$ ) are in actual units.

### ***Phase-2: Full factorial design***

In the Phase-2, significant process variables (initiator concentration, pH and monomer concentration) are taken with modified range selection so as to find optimum process conditions (Table S2). The fixed process conditions are 75 min reaction time, 60°C reaction temperature,  $53.4 \times 10^{-3} \text{ mol L}^{-1}$  of crosslinker and vacuum of 600 mm of mercury. Full factorial design ( $2^3$ ) with 3 center runs were performed (Table S2) and Pareto chart gave pH and initiator concentration as significant process parameters. Pareto chart predicted pH and initiator concentration as highly significant variables exceeding Bonferroni limits (Fig. S2). ANOVA model was generated using highly significant parameters (Table S2). ANOVA model was highly significant at 99.99% ( $F=224$ ) with not-significant *lack of fit* ( $p=0.628$ ) (Table S2). The model high very high prediction capability ( $\text{Pred. } R^2=0.968$ ). Final equation in terms of unitless regression coefficient for fitted model is given below in eq. (3) and in actual factors is given in eq. (4). Finally, highly significant variables were selected for second order model building in phase-3.

$$P_s = + 4378.38 - 194.37 A + 1055.75 C \quad (3)$$

$P_s$ = Percentage Swelling (%) and  $A$ =initiator concentration,  $C$ =pH are in coded units.

$$P_s = - 13689.992 - 22.214 A + 2815.320 C \quad (4)$$

$P_s$ = Percentage Swelling (%) and  $A$ = initiator conc. ( $\text{mol L}^{-1}$ ),  $C$ =pH and are in actual units.

### ***Phase-3: Center composite design***

The effect of pH was studied in the range of 6.65 to 7.35 and initiator concentration between  $17.5 \times 10^{-6}$  to  $30.6 \times 10^{-6} \text{ mol L}^{-1}$  with fixed monomer concentration of  $166.8 \times 10^{-6} \text{ mol L}^{-1}$ . Each variable was varied at 5 levels (-1.41, -1, 0, +1, +1.41) having four factorial points, four axial points and five center runs to check the reproducibility of results (Table S3 and Fig. S3). ANOVA statistics suggested quadratic model best fitted the response data. The reduced quadratic model using backward elimination methods removed 2FI term between pH and initiator concentration based on high alpha to exit ( $p>0.1$ ). Reduced ANOVA model was highly significant at 99.99% ( $F=50.5$ ) with not-significant *lack of fit* ( $p=0.278$ ) (Table S3).



The fitted model explained 96.1% variance ( $R^2=0.961$ ). The model passed the diagnostic tests for any outliers including normal probability plot. Final equation in terms of unitless regression coefficient for fitted model is given below in eq. (5) and in actual factors is given in eq. (6)

$$P_s = + 5223.45 - 295.18 A - 279.35 C - 383.80 A^2 - 739.21 C^2 \quad (5)$$

$P_s$ = Percentage Swelling (%) and  $A$ =initiator concentration,  $C$ =pH and are in coded units.

$$P_s = - 5.753 \times 10^5 + 1.644 \times 10^5 C + 797.414 A - 11827.430 C^2 - 17.903 A^2 \quad (6)$$

$P_s$ = Percentage Swelling (%) and  $A$ = initiator conc. ( $\text{mol L}^{-1}$ ),  $C$ =pH and are in actual units.
